# Supplementary material for: Assessing Healthcare Integration: An Integrated Palliative Care System in Spain
Source: PubMed Central journal article supplement (PMC11451549; doi:10.5334/ijic.8613), 2024-10-03
Supplement: ijic-24-4-8613-s1.pdf [file ijic-24-4-8613-s1.pdf]

## APPENDICES

### Appendix A. Documents and Databases List

| Documents  |                                                                                                                                                                                                                                                                                                                                                                                                                                                                                                                                                                         |
|------------|-------------------------------------------------------------------------------------------------------------------------------------------------------------------------------------------------------------------------------------------------------------------------------------------------------------------------------------------------------------------------------------------------------------------------------------------------------------------------------------------------------------------------------------------------------------------------|
| 1          | Amil, P., Constante, C., González Mestre, A., Sarquella, E., Ledesma, A., Cabezas, C., Zara, C., Contel, J. C., Puigdollers, M., & Blay, C. (2016). Chronic and integrated care in Catalonia. <i>International Journal of Integrated Care</i> , 15(2). <a href="https://doi.org/10.5334/ijic.2205">https://doi.org/10.5334/ijic.2205</a>                                                                                                                                                                                                                                |
| 2          | Blay Pueyo, C. (2017). <i>Característiques i consum de recursos sanitaris de persones amb malalties cròniques avançades: Un estudi de cohort</i> . <a href="http://hdl.handle.net/10803/404680">http://hdl.handle.net/10803/404680</a>                                                                                                                                                                                                                                                                                                                                  |
| 3          | Consorci Hospitalari de Vic. (2019). <i>Consorci Hospitalari Vic. Memòria 2018</i> . <a href="http://www.chv.cat/consorci/comunicacio/memories/2018-memoria/professionals/">http://www.chv.cat/consorci/comunicacio/memories/2018-memoria/professionals/</a>                                                                                                                                                                                                                                                                                                            |
| 4          | Generalitat de Catalunya. Departament de Salut. (2012a). <i>Pla de Salut 2011-2015 del Programa de prevenció i atenció a la cronicitat de la Generalitat de Catalunya</i> . <a href="http://projectes.camfic.cat/CAMFIC/Seccions/Formacio/Docs/Material_IX_Directius/03Chronic/Contel.pdf">http://projectes.camfic.cat/CAMFIC/Seccions/Formacio/Docs/Material_IX_Directius/03Chronic/Contel.pdf</a>                                                                                                                                                                     |
| 5          | Generalitat de Catalunya. Departament de Salut. (2017a). <i>Regió Sanitària Catalunya Central Memòria 2017</i> . <a href="http://catsalut.gencat.cat/ca/coneix-catsalut/catsalut-territori/catalunya-central/">http://catsalut.gencat.cat/ca/coneix-catsalut/catsalut-territori/catalunya-central/</a>                                                                                                                                                                                                                                                                  |
| 6          | Generalitat de Catalunya. Departament de Salut. (2012b). <i>El Programa de prevenció i atenció a la cronicitat</i> . <a href="http://salutweb.gencat.cat/web/.content/home/ambits_tematicos/linies_dactuacio/model_assistencial/atencio_al_malalt_cronic/destacats_a_la_dreta/avaluacio_cronicitat_2011_2014.pdf">http://salutweb.gencat.cat/web/.content/home/ambits_tematicos/linies_dactuacio/model_assistencial/atencio_al_malalt_cronic/destacats_a_la_dreta/avaluacio_cronicitat_2011_2014.pdf</a>                                                                |
| 7          | Generalitat de Catalunya. Departament de Salut. (2017c). <i>Recursos Específics de Cuidados Paliatius. DIRCAT-CP 2017. Generalitat de Catalunya. Departament de Salut</i> . <a href="http://canalsalut.gencat.cat/web/.content/home_canal_salut/professionals/temes_de_salut/atencio_al_final_de_la_vida/documents_prof/paliatiusdefinitiu.pdf%0Ahttp://salutweb.gencat.cat">http://canalsalut.gencat.cat/web/.content/home_canal_salut/professionals/temes_de_salut/atencio_al_final_de_la_vida/documents_prof/paliatiusdefinitiu.pdf%0Ahttp://salutweb.gencat.cat</a> |
| 8          | Generalitat de Catalunya. (2019c). <i>Afiliació al règim general de la Seguretat Social, mineria del carbó i RETA</i> . Observatori Del Treball i Model Productiu. <a href="http://observatorit treball.gencat.cat/ca/ambits_tematicos/mercat_de_treball/afiliacio_ss/mineria_carbo_i_regim_especial_autonomos/">http://observatorit treball.gencat.cat/ca/ambits_tematicos/mercat_de_treball/afiliacio_ss/mineria_carbo_i_regim_especial_autonomos/</a>                                                                                                                |
| 9          | Generalitat de Catalunya. (2016b). <i>Pla de Salut de Catalunya 2016-2020. Generalitat de Catalunya. Departament de Salut</i> . 1–161. <a href="https://doi.org/10.1017/CBO9781107415324.004">https://doi.org/10.1017/CBO9781107415324.004</a>                                                                                                                                                                                                                                                                                                                          |
| 10         | Gómez-Batiste, X., Martínez-Muñoz, M., Blay, C., Amblàs, J., Vila, L., Costa, X., Villanueva, A., Espauella, J., Espinosa, J., Figuerola, M., & Constante, C. (2012b). Identifying patients with chronic conditions in need of palliative care in the general population: Development of the NECPAL tool and preliminary prevalence rates in Catalonia. <i>BMJ Supportive and Palliative Care</i> , 3(3), 300–308. <a href="https://doi.org/10.1136/bmjspcare-2012-000211">https://doi.org/10.1136/bmjspcare-2012-000211</a>                                            |
| 11         | Gómez-Batiste, X., Martínez-Muñoz, M., Blay, C., Amblàs, J., Vila, L., Costa, X., Espauella, J., Espinosa, J., Constante, C., & Mitchell, G. K. (2014b). Prevalence and characteristics of patients with advanced chronic conditions in need of palliative care in the general population: A cross-sectional study. <i>Palliative Medicine</i> , 28(4), 302–311. <a href="https://doi.org/10.1177/0269216313518266">https://doi.org/10.1177/0269216313518266</a>                                                                                                        |
| 12         | Gómez-Batiste, X., Blay, C., Martínez-Muñoz, M., Lasmariás, C., Vila, L., Espinosa, J., Costa, X., Sánchez-Ferrín, P., Bullich, I., Constante, C., & Kelley, E. (2016). The Catalonia WHO Demonstration Project of Palliative Care: Results at 25 Years (1990–2015). <i>Journal of Pain and Symptom Management</i> , 52(1), 92–99. <a href="https://doi.org/10.1016/j.jpainsymman.2015.11.029">https://doi.org/10.1016/j.jpainsymman.2015.11.029</a>                                                                                                                    |
|            | Fundació Hospital de la Santa Creu. (2018). Retrieved July 20, 2019, from <a href="http://www.chv.cat/consorci/comunicacio/memories/2018-memoria-fhsc/aixi-som/les-persones/">http://www.chv.cat/consorci/comunicacio/memories/2018-memoria-fhsc/aixi-som/les-persones/</a>                                                                                                                                                                                                                                                                                             |
| 13         |                                                                                                                                                                                                                                                                                                                                                                                                                                                                                                                                                                         |
| 14         | Roca, J., & Ramón, I. (2010). Atención sanitaria integrada en Osona como respuesta al desafío de la cronicidad. In <i>Fundación Signo</i> (Vol. 11). <a href="https://www.fundacionsigno.com/archivos/publicaciones/2010m9_p135.pdf">https://www.fundacionsigno.com/archivos/publicaciones/2010m9_p135.pdf</a>                                                                                                                                                                                                                                                          |
| 15         | Observatori Socioeconòmic D'Osona. (2018). Retrieved July 17, 2019, from <a href="http://www.observatorisocioeconomicosona.cat/">http://www.observatorisocioeconomicosona.cat/</a>                                                                                                                                                                                                                                                                                                                                                                                      |
| 16         | Santaeugènia González, S. J. (2017) <i>Atenció Integrada i Cronicitat PPAC-PIAIISS</i> .                                                                                                                                                                                                                                                                                                                                                                                                                                                                                |
| 17         | Sistema Integrat de Salut d'Osona. (2016). <i>Sistema Integrat de Salut d'Osona Actuacions 2015</i> .                                                                                                                                                                                                                                                                                                                                                                                                                                                                   |
| 18         | Termcat. Generalitat de Catalunya. (2013). <i>Terminologia de la cronicitat</i> . Termcat/Centre de Terminologia. <a href="https://www.termcat.cat/ca/recursos/productes-multimedia/terminologia-la-cronicitat">https://www.termcat.cat/ca/recursos/productes-multimedia/terminologia-la-cronicitat</a>                                                                                                                                                                                                                                                                 |
| Data Bases |                                                                                                                                                                                                                                                                                                                                                                                                                                                                                                                                                                         |
| 19         | Generalitat de Catalunya. MSIQ. Mòduls de seguiment d'indicadors de qualitat (2019). Retrieved July 23, 2019, from <a href="https://msiq.catsalut.cat/index.html">https://msiq.catsalut.cat/index.html</a>                                                                                                                                                                                                                                                                                                                                                              |
| 20         | Generalitat de Catalunya. Institut d'estadística de Catalunya. Idescat (2020). Retrieved July 15, 2019 from: <a href="https://www.idescat.cat/?lang=en">https://www.idescat.cat/?lang=en</a>                                                                                                                                                                                                                                                                                                                                                                            |

## Appendix B. Documents, categories and codes

| Data Collection Questions                             | Main Categories                              | Generic Categories                                              | Preliminary codes                                                                     |
|-------------------------------------------------------|----------------------------------------------|-----------------------------------------------------------------|---------------------------------------------------------------------------------------|
| What is the nature of the OPCS context and structure? | Density                                      | Medium density Region                                           | -Population<br>-Area<br>-Inhabitants                                                  |
|                                                       | Demography                                   | Demography characteristics                                      | -Age distribution<br>-Ageing<br>-Immigration<br>-Income                               |
|                                                       |                                              | Incidence of diseases in population                             | -Population distribution in Primary Care centres<br>-Mortality, morbidity, prevalence |
| What are the system's characteristics?                | Services offered                             | Type of health centres and PC services                          | - Levels of care centres and services<br>-PC specific services                        |
|                                                       | Membership size                              | Number of services used and patients served                     | - PC patients served<br>- Services used                                               |
|                                                       | Extent of participation in network           | -Coordinating organisation                                      | - SISO pluridisciplinary groups                                                       |
|                                                       | Networks ideals                              | Patient-centred Integral services                               | - Continuity of care<br>- Patient-centred care                                        |
|                                                       | Policies                                     | Health plans and programmes and services to the chronically ill | -Chronicity programmes<br>-Health plans for integral services<br>-PC directory        |
| How is the economic and financial situation?          | Network resources                            | Number of hospitals, clinics, centres and professionals         | -Hospitals, clinics, centres<br>-Number of professionals in the health sector         |
|                                                       | Presence of 24/7 care                        | 24/7 vision                                                     | - Intervention plan and medical History online documents<br>- 12 hours PADES          |
| What are the providers' characteristics?              | Cooperation                                  | Cooperation at different levels of care and services            | -Collaboration                                                                        |
|                                                       | Perceived Interdependence                    | Case management and multidisciplinary teams                     | -multidisciplinary, interdisciplinary work<br>- case management                       |
|                                                       | Specialty training                           | Training strategies                                             | - Training and education                                                              |
| How is the information shared?                        | Information systems and materials            | Digital health related information sharing                      | - Clinical History<br>- Personal health channel<br>-Si-Siso informatics system        |
|                                                       | Standard assessment monitoring patient needs | Patient early identification                                    | - Patient identification<br>- Screening Tools                                         |
| What are the organisational factors?                  | Care team composition                        | Care team professionals                                         | Professionals in hospitals and primary care                                           |
|                                                       | Standard implementation models               | Standard models                                                 | -Chronicity Programme development<br>-Care pathways                                   |
|                                                       | Programme evaluation                         | Cost-efficiency                                                 | - Emergency hospitalisations and admissions reduction                                 |

## Appendix C. Interview

MACA patients with advanced chronic disease  
SPCO Palliative System of the Region of Osona

### 1. Imagine a perfect or ideal model of an integrated palliative care system that is for MACA patients [advanced chronic patients]. What elements should it have?

Please specify, within this perfect / ideal model of an integrated palliative care system for MACA patients, what these factors would be / how would they function? [if not stated above]:

- **professionals** providing palliative services in an integrated system.
- **collaboration** within the system of an integrated system.
- **sharing information** within an integrated system.
- **patient detection**
- **organization** in the system as an integrated system.
- the **services** offered to palliative patients

### 2. If you think about these elements for an ideal/perfect integrated palliative care system:

2.1. Please tell me which of them would be the **most important** elements, from the most to least important? And why?

### 3. Now I would like you to think about the SPCO. Comparing the SPCO with an Ideal Integrated Palliative Care System, what factors/elements does the SPCO have as an integrated palliative care system for the MACA patient?

3.1. What factors / elements mentioned above are missing or lacking in the SPCO? Why don't we have them?

### 4. Please tell me, from the factors / elements mentioned, which would be the most important to have [from the most to least important] given the context of the system in the Osona region [due to its geography, population, culture]

### 5. In your professional practice, what kind of ethical dilemmas [complicated situations as a professional] do you find yourself in when providing integrated services to the palliative patient with advanced chronic disease?

## Appendix D. Interviews, categories and codes

- **Multidisciplinary / Interdisciplinary teams**, include professionals from different specialties, and disciplines such a doctors, specialists, nurses, psychologists, chaplains, physiotherapists and nutritionists. Teams organized from the inpatient to primary care and within organizations with a common goal to meet the patients' needs.
  - Coding rules:** *organization of professionals from different specialties, disciplines, levels of care and organizations. The process of being organized in a team.*
  - Anchor sample:** *"Teams that include all the professionals involved, such as a doctor, nurse and social worker".*
- **Case management** provides comprehensive care for the patient's physical, functional, pharmacological, social, emotional and financial needs that will interact with patients through care transitions.
  - Coding rules:** *comprehensive care for all patient dimensions that interacts with patients through care transitions.*
  - **Anchor sample:** *"A liaison nurse that works with the all the other services".*
- **Coordination**, meaning collaboration of services and organizations between primary and secondary services, home services from different specialties and across professionals.
  - Coding rules:** *collaboration between professionals, services, specialties and organizations. The process of working together.*
  - Anchor sample:** *"The process of collaboration among the professionals from all the services".*
- **Continuity of care** can be achieved with the integration of outpatient and inpatient services provided by health systems by bridging across settings. It is provided between all agents involved in the IPC services and all the health care settings. The continuity process occurs when there is sharing of patients' documentation electronically, by care conferences, and with electronic, phone and in-person communication within the team members.
  - Coding rules:** *Services integration, bridging of levels of inpatient care and outpatient services.*
  - Anchor sample:** *"The connectivity of care between the different levels of care that work as a network".*
- **Early Intervention of IPC** with patients with advanced chronic conditions in need of this care. The identification of these patients should be early on in their disease process by performing early geriatric evaluations and by applying it right at the beginning of diagnosis.
  - Coding rules:** *Identify patient early on in their disease [by labelling him a palliative care patient [terminal/ advanced chronic] diagnosis.*
  - Anchor sample:** *"Detect the MACA patient with the first signs".*
- **Patient-centred** means that IPC focuses the care on fulfilling the needs and preferences of patients, their families and caregivers.
  - Coding rules:** *care focuses on the patients' and their families' needs and preferences.*
  - Anchor sample:** *"Care that responds to the patients' preferences".*
- **Training and education** involve the provision of educational opportunities to promote further learning. Training and education are necessary for the IPC provider in order to give them confidence in service provision and to develop their competence.
  - Coding rules:** *develop competencies.*
  - Anchor sample:** *"To educate and train these professionals in the PC model".*
- **A standard implementation model** should be applied in IPC direct services and health practices. A standard model is a key element for effective care delivery and is developed by all stakeholders.
  - Coding rules:** *a standard model is implemented in all care practices by all the professionals. The same model is applied everywhere by all the professionals.*
  - Anchor sample:** *"Basic model of care that in which all professionals are trained and that is agreed, explained, repeated and trained by all the professionals, a way of doing, a culture".*

- **Supportive Policies and leadership:** formal and informal guidelines, agreements, rules that guide and support the programme. Specific policies for IPC are necessary and they need to be established at the national and regional level. Leaders that inspire and encourage an optimal process for the organization's proper functioning.
  - Coding rules:** *supportive guidelines, rules or professionals that are positive for the programme.*
  - Anchor sample:** *"Policies, territorial governance", "leadership", "good leaders that are concerned about PC and provide the other professionals with a lot of feedback".*
- **Shared Information Systems:** structure that facilitates the exchange of information via technology sharing [electronic health records, videoconferencing] or written/visual aids. This system facilitates the collection, reporting and availability of patient information to care providers and it insures effective IPC care delivery.
  - Coding rules:** *system that facilitates exchange of patients' information by all professionals [videoconference, electronic records sharing, written material].*
  - Anchor sample:** *"An information sharing system that allows for interconnectivity".*
- **A standard screening tool** helps providers to identify the IPC patient and determine prognosis. It screens for symptoms and assesses the patient and generates service referrals.
  - Coding rules:** *tool to identify IPC patient and produce care referral.*
  - Anchor sample:** *"A screening system that allows us to detect the population that will most need PC".*
- **Funding for IPC** financial resources is essential at the country and regional level. Deficient funding is an inhibitor for IPC and its proper functioning. *Resources*, both human and social, are essential for the effectiveness of an IPS.
  - Coding rules:** *finances, human and social resources provided to the IPC system.*
  - Anchor sample:** *"To have sedation kits", "more professionals", "more services like rehabilitation".*
- **Cost-efficiency** can be the result of the implementation of an IPS, since it decreases emergency visits and inappropriate admissions, reduces the time in hospitalization stays, reduces infection acquisition and delirium/confusion development from hospitalizations. It also reduces the cost of care in general for the IPC patient.
  - Coding rules:** *reduces IPC cost for care. Could result from IPC.*
  - Anchor sample:** *"It reduces over diagnosis and overtreatment".*

## Appendix E. Excluded Elements in the OPCS, Categories and Codes

| Preliminary codes                        | Groups of Codes                                       | Subcategory                                           | Generic Category                                              | Main Category                 |
|------------------------------------------|-------------------------------------------------------|-------------------------------------------------------|---------------------------------------------------------------|-------------------------------|
| 24/7                                     | 24/7                                                  | 24/7 care                                             | PC care fragmentation                                         | Continuity of care            |
| No service continuity                    | Services level no continuity                          | Intra-level fragmentation                             |                                                               |                               |
| Health and social services disconnection | Health and social services no continuity              | Health and social service fragmentation               |                                                               |                               |
| Various professionals                    | Professionals                                         | Professionals missing                                 | Missing specific PC funding and resources                     | Funding and resources         |
| Various services                         | Services                                              | Services missing                                      |                                                               |                               |
| Various resources                        | Resources                                             | Resources missing                                     |                                                               |                               |
| Funding                                  | PC funding                                            | PC specific funding missing                           |                                                               |                               |
| Information platforms                    | Information platforms                                 | Improve single information sys.                       | Shared single information system                              | Information system            |
| Modalities: phone, videoconference, etc. | Information modalities                                | Multiple information modalities                       |                                                               |                               |
| Communication Coordination               | Professionals' collaboration                          | Professionals' collaboration                          | Improve collaboration                                         | Coordination                  |
| Health and social services               |                                                       | Coordination health and social services               |                                                               |                               |
| Education, training                      | Education/training                                    | PC specialised education and training                 | Need for PC standardised education/training                   | Training and education        |
| Identification, labelling PC patient     | Labelling, identifying PC patient screening tool      | PC PT labelling difficulty                            | Screening tool difficulties                                   | Standard screening tool       |
| Routes, vision, goals for PC patient     | PC standard model Implementation difficulties         | PC standard implementation difficulties               | PC standard implementation model difficulties                 | Standard implementation model |
| Infra-identification                     | PC patient infra-identification and late intervention | PC patient infra-identification and late intervention | PC patient early identification and intervention difficulties | Early intervention            |
| Needs, preferences, opinions             | Patient centred                                       | PC patient centred                                    | Patient centred PC care                                       | Patient centred               |
| Policies                                 | Policies                                              | Specific PC policies                                  | Specific PC policies                                          | Policies and leadership       |
| Case manager                             | PC case manager identification                        | PC case manager identification                        | PC Case management                                            |                               |
| Volunteers                               |                                                       | Volunteers                                            | PC Volunteers                                                 |                               |
